# Supplementary material for: Dissecting the Transcriptomes of Multiple Metronidazole-Resistant and Sensitive Trichomonas vaginalis Strains Identified Distinct Genes and Pathways Associated with Drug Resistance and Cell Death
Source: MDPI journal article supplement (doi:10.3390/biomedicines9121817), 2021-12-02
Supplement: s1 [file s1]

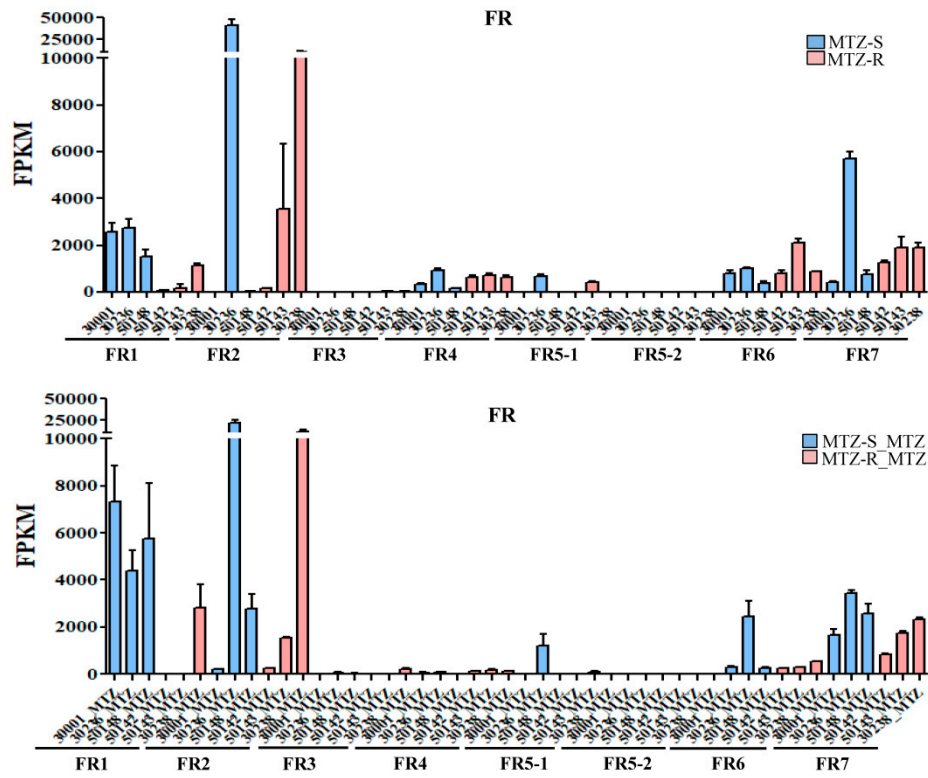

**Figure S1.** Differential expression of FR genes in the MTZ-R transcriptomes treated with or without MTZ. The expression levels of different FR isoforms (FR1-FR7) in the MTZ-S and MTZ-R strains treated with or without MTZ were analyzed and presented as mean  $\pm$  SD of FPKM values obtained from three independent RNA-seq data.



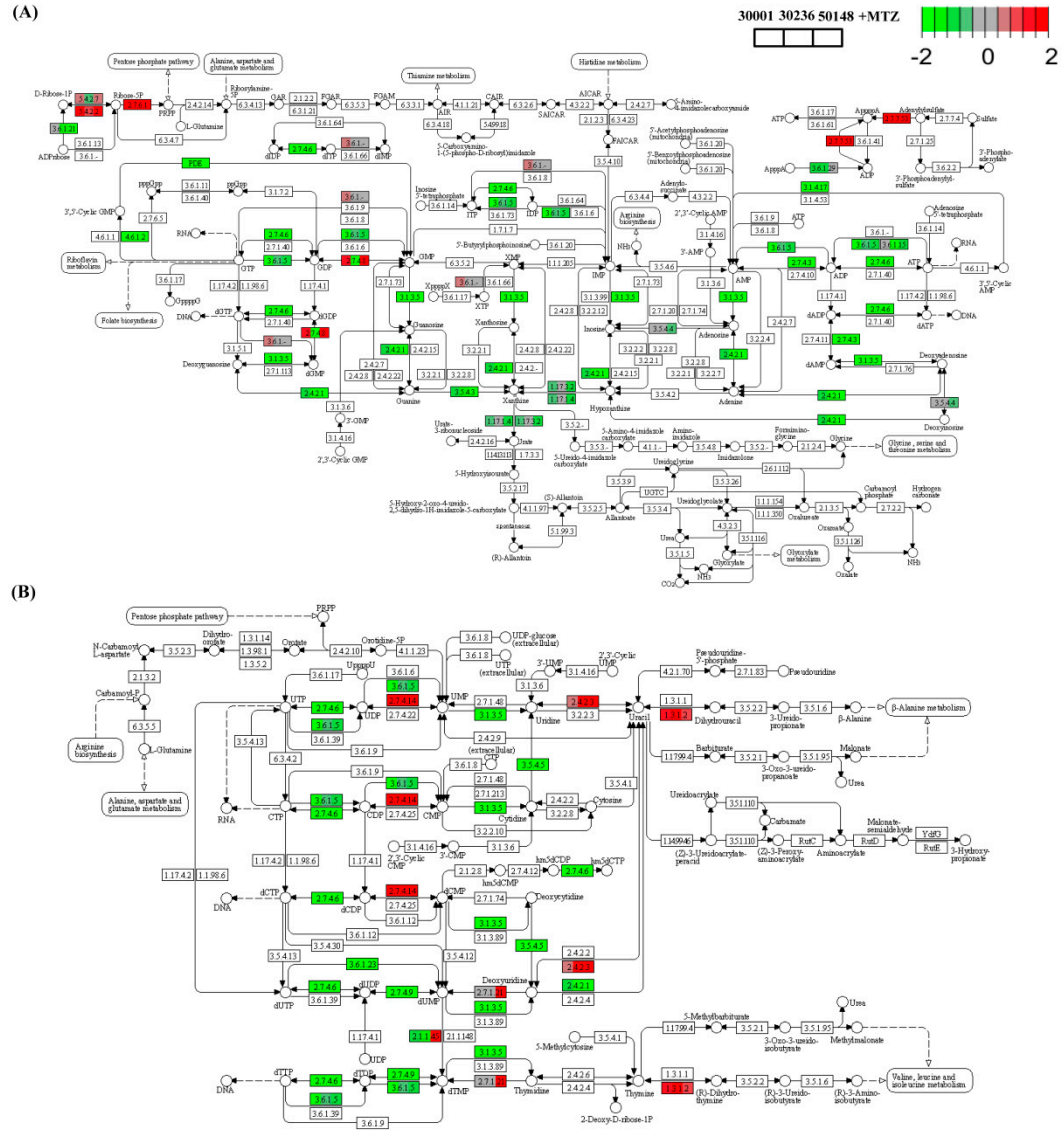

**Figure S2.** Functional enrichment analysis identified the most downregulated pathways in MTZ-S parasites treated with MTZ. KEGG enrichment analysis identified the downregulated pathways related to purine (A) and pyrimidine (B) metabolism in MTZ-S *T. vaginalis* transcriptomes treated with MTZ compared with those of the untreated MTZ-S isolates. The gene expression changes were presented as log2 fold change (FPKM of genes in each MTZ-S isolate (Tv-30001, Tv30236, and Tv-50148) treated with MTZ compared with that in the untreated isolate). The differential gene expression results from the three strains were combined into a particular gene. Genes shown in red and gene color indicate upregulation and downregulation, respectively.



30001 30236 50148 +MTZ

-2 0 2

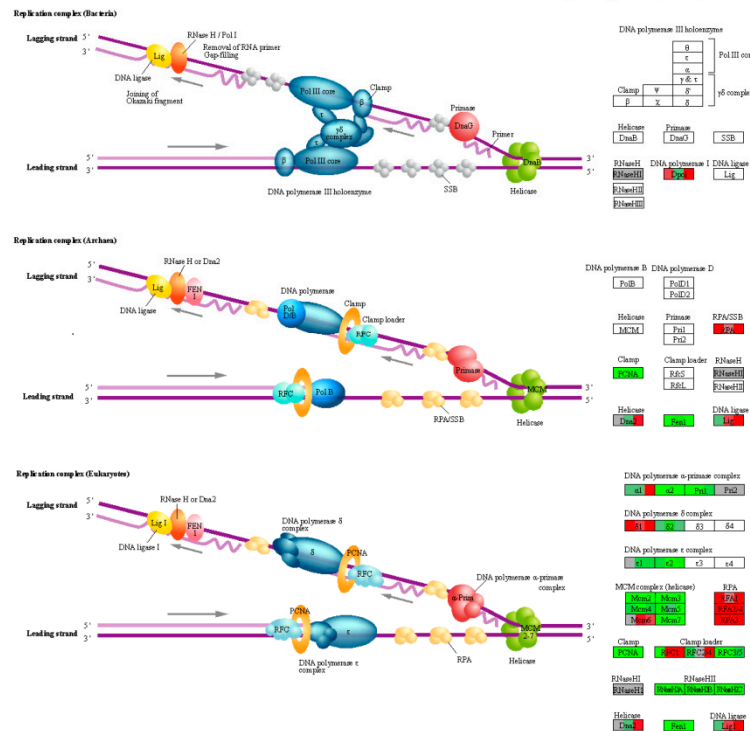

**Figure S3.** Functional enrichment analysis identified the DNA replication pathway to be down-regulated in MTZ-S parasites treated with MTZ. KEGG enrichment analysis identified the down-regulated pathway related to DNA replication in MTZ-S *T. vaginalis* transcriptomes treated with MTZ compared with that of the untreated MTZ-S isolates. The gene expression changes were presented as log2 fold change (FPKM of genes in each MTZ-S isolate (Tv-30001, Tv30236, and Tv-50148) treated with MTZ compared with that in the untreated isolate). The differential gene expression results from the three strains were combined into a particular gene. Genes shown in red and gene color indicate upregulation and downregulation, respectively.







**Figure S5.** Functional enrichment analysis identified the protein processing in endoplasmic reticulum pathway to be upregulated in MTZ-S parasites treated with MTZ. KEGG enrichment analysis identified the downregulated pathway related to the protein processing in endoplasmic reticulum in MTZ-S *T. vaginalis* transcriptomes treated with MTZ compared with that of the untreated MTZ-S isolates. The gene expression changes were presented as log2 fold change (FPKM of genes in each MTZ-S isolate (Tv-30001, Tv30236, and Tv-50148) treated with MTZ compared with that in the untreated isolate). The differential gene expression results from the three strains were combined into a particular gene. Genes shown in red and gene color indicate upregulation and downregulation, respectively.

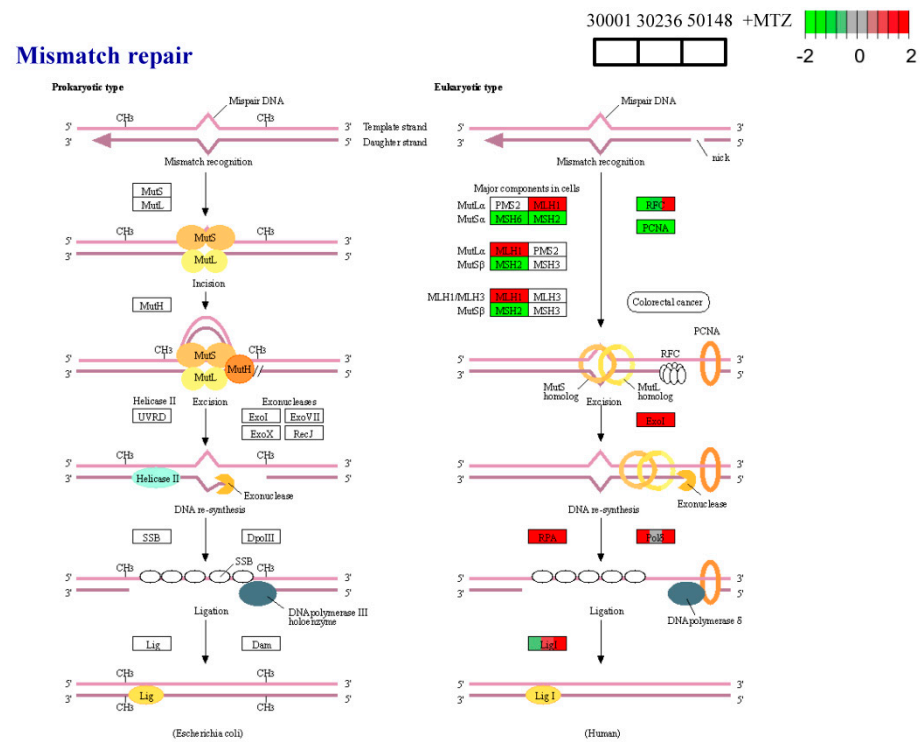

**Figure S6.** Functional enrichment analysis identified the mismatch repair pathway to be upregulated in MTZ-S parasites treated with MTZ. KEGG enrichment analysis identified the downregulated pathway related to the mismatch repair pathway in MTZ-S *T. vaginalis* transcriptomes treated with MTZ compared with that of the untreated MTZ-S isolates. The gene expression changes were presented as log2 fold change (FPKM of genes in each MTZ-S isolate (Tv-30001, Tv30236, and Tv-50148) treated with MTZ compared with that in the untreated isolate). The differential gene expression results from the three strains were combined into a particular gene. Genes shown in red and gene color indicate upregulation and downregulation, respectively.



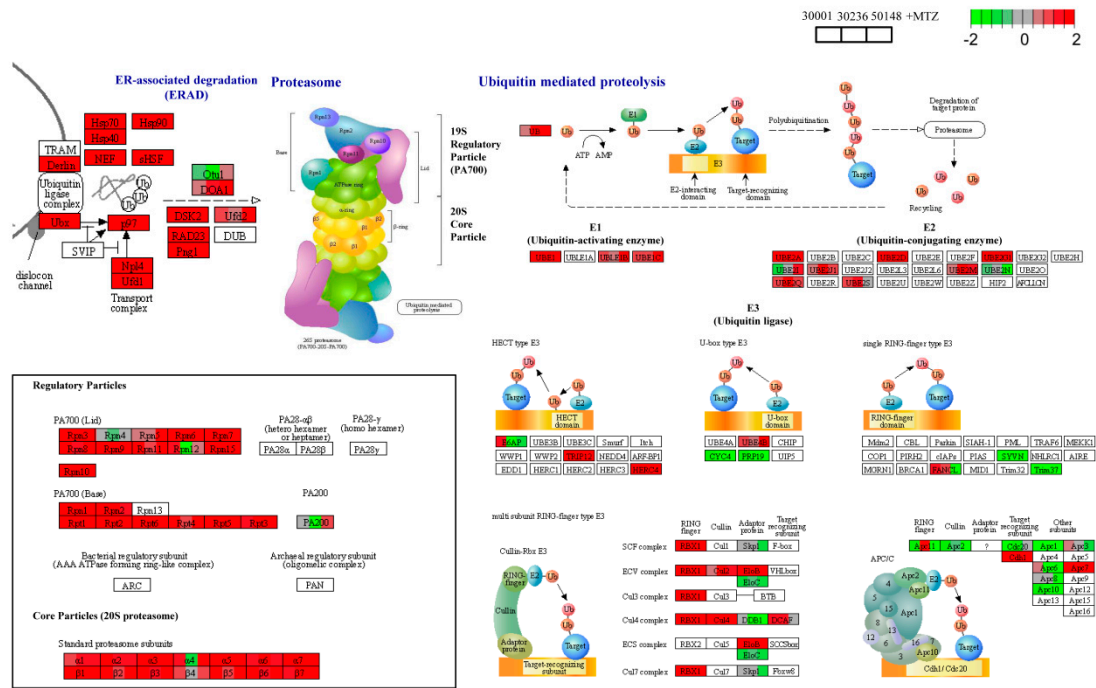

**Figure S7.** The most enriched pathways in MTZ-S parasites treated with MTZ compared with the untreated parasites. Functional enrichment analysis based on the KEGG database identified the most upregulated pathways related to proteolysis in MTZ-S *T. vaginalis* transcriptomes treated with MTZ compared with those of MTZ-S. ERAD is involved in the protein processing in the ER pathway. Proteasome contains regulatory particles and core particles. Ubiquitin-mediated proteolysis is comprised of E1 (ubiquitin-activating enzyme), E2 (ubiquitin-conjugating enzyme), and E3 (ubiquitin ligase). The gene expression changes were presented as log2 fold change (FPKM of genes in each MTZ-S isolate (Tv-30001, Tv30236, and Tv-50148) treated with MTZ compared with that in the untreated isolate). The differential gene expression results from the three strains were combined into a particular gene. Genes shown in red and gene color indicate upregulation and downregulation, respectively.



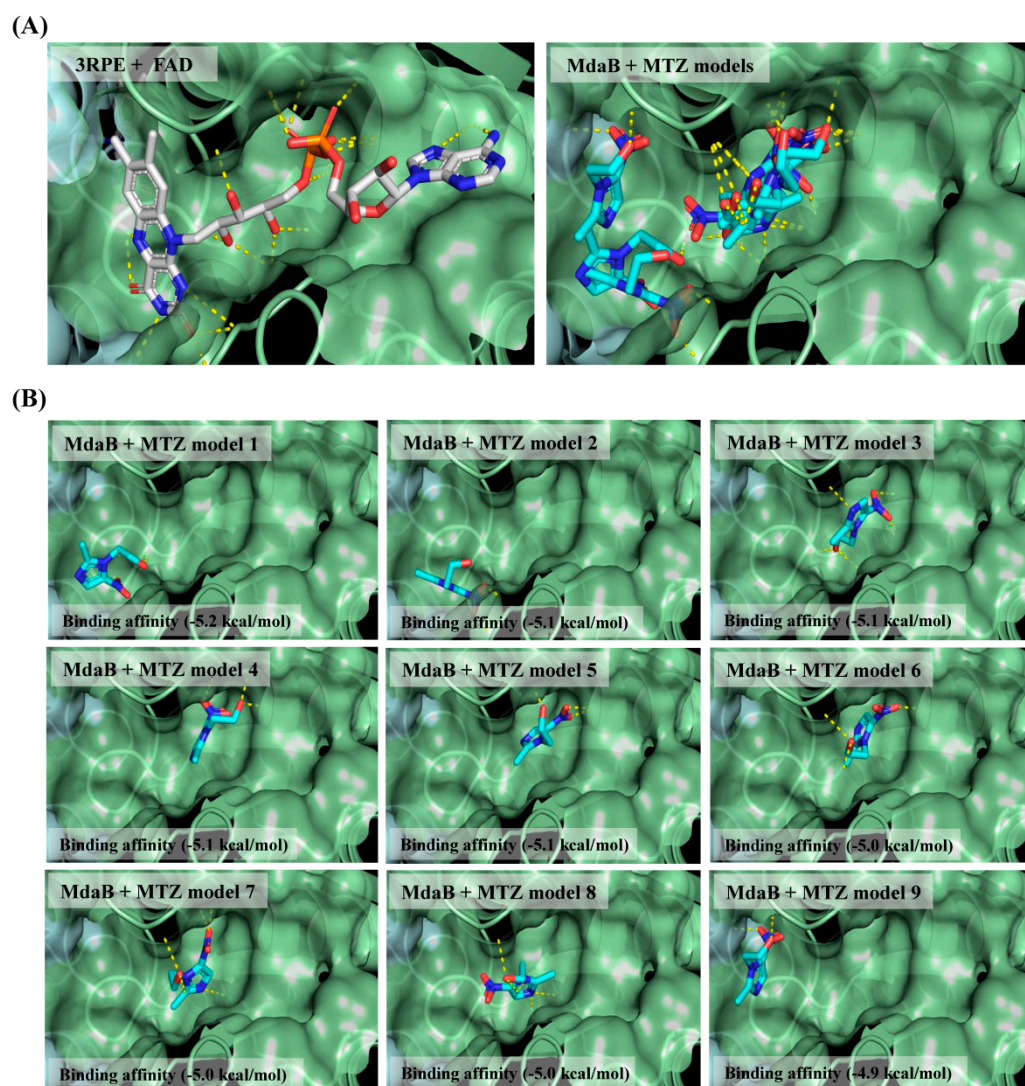

**Figure S8.** Proposed models for molecular docking of MTZ with MdaB. (A) MdaB was identified as a template structure based on high coverage and sequence similarity with the target protein, which is an experimentally determined FAD-MdaB crystal structure deposited in RCSB Protein Data Bank (PDB ID: 3RPE). Molecular docking analysis predicts all possible MTZ conformations that fit well into the same active site of the modeled structure established from the template structure of FAD-MdaB complex. (B) All the predicted models of the MTZ ligands represent sufficient binding strength with the target protein with binding affinity around -5.0 kcal/mol and fit well into the same binding site as FAD.



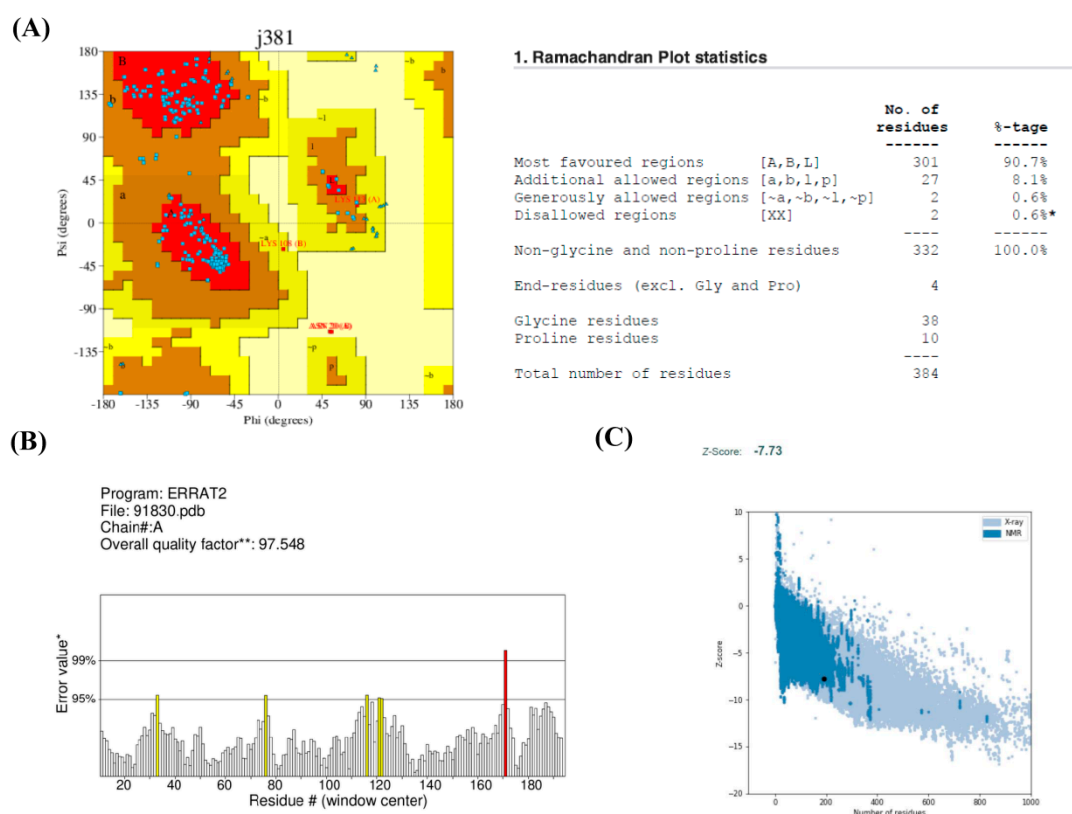

**Figure S9.** Validation of the predicted model by different diagnostic methods. **(A)** Ramachandran analysis shows that over 98.8% of the backbone dihedral angles from the modeled structure are located in energetically allowed regions. **(B)** The overall quality score of the modeled structure is 97.548, which is better than the ideal score value of 95%, based on analyzing the relative frequencies of noncovalent interactions between various atom types by ERRAT program. **(C)** ProSA is widely employed in the validation of protein structures obtained from experimentally determined methods and theoretical calculations. The Z-score indicates the overall quality of the modeled structure of MdaB and is highlighted as a black dot in the figure. As shown as a black dot in this figure, the overall model quality (Z-score) of the modeled structure of MdaB is within the range of scores characteristic for native proteins of similar size determined by X-ray crystallography (light blue) or NMR-spectroscopy (dark blue), deposited in RCSB Protein Data Bank.
